# Supplementary material for: Birth mode-dependent association between pre-pregnancy maternal weight status and the neonatal intestinal microbiome
Source: PubMed Central journal article supplement (PMC4817027; doi:10.1038/srep23133), 2016-04-01

**Manuscript Title:** Birth mode-dependent association between pre-pregnancy maternal weight status and the neonatal intestinal microbiome

**Authors:** Noel T Mueller<sup>1,\*</sup>, PhD; Hakdong Shin<sup>2</sup>, PhD; Aline Pizoni<sup>3</sup>; Isabel C Werlang<sup>3</sup>, PhD; Ursula Matte<sup>5</sup>, PhD; Marcelo Z Goldani<sup>4,6</sup>, MD, PhD; Helena AS Goldani<sup>3,4,6</sup> MD, PhD; Maria Gloria Dominguez-Bello<sup>2\*</sup>

**Affiliations:**

<sup>1</sup>Department of Epidemiology, Johns Hopkins Bloomberg School of Public Health, Baltimore, MD

<sup>2</sup>New York University School of Medicine, New York, NY

<sup>3</sup>Post-Graduate Program Sciences in Gastroenterology and Hepatology, Faculty of Medicine, Federal University of Rio Grande do Sul, Porto Alegre – RS, Brazil.

<sup>4</sup>Laboratory of Translational Pediatrics, Hospital de Clínicas de Porto Alegre, Federal University of Rio Grande do Sul, Porto Alegre – RS, Brazil

<sup>5</sup>Department of Genetics, Federal University of Rio Grande do Sul, Porto Alegre – RS, Brazil

<sup>6</sup>Department of Pediatrics, Faculty of Medicine, Federal University of Rio Grande do Sul, Porto Alegre – RS, Brazil

**Corresponding authors:**

Noel Theodore Mueller

Address: 2024 E. Monument St., Suite 2-600, Baltimore, MD, 21287

Email: [nmuelle4@jhu.edu](mailto:nmuelle4@jhu.edu)

Phone: 410-614-7628

Maria Gloria Dominguez-Bello

Address: 462 First Avenue, New York, NY 10016

Email: [Maria.Dominguez-Bello@nyumc.org](mailto:Maria.Dominguez-Bello@nyumc.org)

Phone: 646-501-0703

## SUPPLEMENTARY FILES

### Legends:

**Table S1.** Summary of analyzed 16S rRNA sequence data.

**Table S2.** Comparing the relative abundance of *Bacteroides* operational taxonomic units in the stool of neonates using BLASTN.

**Figure S1.** Bacterial beta diversity in newborn feces according to mode of delivery. Weighted (left) and unweighted (right) UniFrac distances were used to evaluate beta diversity. PERMANOVA was used to test dissimilarity.

**Figure S2.** Phylogenetic diversity (A), observed species (B), and species richness (C) plots for bacterial operating taxonomic units (OTUs) in newborn feces according to mode of delivery. All communities were rarefied up to 1,634 reads per sample to calculate bacterial diversity (means  $\pm$  1 SE).

**Figure S3.** Phylogenetic diversity (A), observed species (B), and species richness (C) plots for bacterial operating taxonomic units (OTUs) in neonatal feces according to mode of delivery and maternal pre-pregnancy BMI. All communities were rarefied up to 1,634 reads per sample to calculate bacterial diversity (means  $\pm$  1 SE).

**Figure S4.** Differences in relative abundance of bacterial taxa in newborn feces according to mode of delivery. **A.** Bacterial taxonomic plots are shown at the phylum and genus levels. Each taxon representing  $>1\%$  of the average relative abundance in study groups is indicated by a different color. Taxa are reported at the lowest identifiable level, indicated by the letter preceding the underscore: f, family; g, genus. **B.** Histogram of significant bacterial taxonomic biomarkers in each group; LDA Effect Size ( $>3.0$ -fold) was used to determine significant biomarkers.

**Figure S5.** Differences in relative abundance of bacterial taxa in newborn feces by pre-pregnancy maternal BMI according to delivery mode. Bacterial taxonomic plots at the phylum (A) and genus (B) levels for each newborn. Each taxon representing  $>1\%$  of the average relative abundance is indicated by a different color. Taxa are reported at the lowest identifiable level, indicated by the letter preceding the underscore: f, family; g, genus.

**Figure S6.** Bacterial beta diversity in the feces of Cesarean (C-section) delivered newborns according to whether their (A) mothers were treated or were not treated with prenatal antibiotics, or whether (B) they were or were not breastfed in first 24 hours after birth. Weighted UniFrac distances were used to evaluate diversity and PERMANOVA was used to test dissimilarity.

**Table S1.** Summary of analyzed 16S rRNA sequence data.

|                                                     | <b>Cesarean delivered neonates (n = 56)</b> |                            | <b>Vaginally delivered neonates (n = 18)</b> |                            |                        |
|-----------------------------------------------------|---------------------------------------------|----------------------------|----------------------------------------------|----------------------------|------------------------|
|                                                     | Maternal pre-pregnancy BMI status           |                            |                                              |                            |                        |
| <b>Characteristics</b>                              | <b>Normal weight</b>                        | <b>Overweight or Obese</b> | <b>Normal weight</b>                         | <b>Overweight or Obese</b> | <b>Total</b>           |
| Number of samples                                   | 30                                          | 26                         | 13                                           | 5                          | 74                     |
| Total number of sequences                           | 261,408                                     | 266,333                    | 144,133                                      | 53,215                     | 725,089                |
| Mean number of sequences ( $\pm$ SEM)               | 8,714<br>$\pm$ 662                          | 10,244<br>$\pm$ 863        | 11,087<br>$\pm$ 926                          | 10,643<br>$\pm$ 2,209      | 9,799<br>$\pm$ 474     |
| Total number of sequences yielding OTUs             | 250,004                                     | 258,927                    | 125,657                                      | 47,326                     | 681,914<br>(6.0% loss) |
| Mean number of sequences yielding OTUs ( $\pm$ SEM) | 8,333<br>$\pm$ 639                          | 9,959<br>$\pm$ 832         | 9,666<br>$\pm$ 1,018                         | 9,465<br>$\pm$ 2,453       | 9215<br>$\pm$ 468      |
| Number of observed OTU types                        | 2,353                                       | 1,822                      | 1,219                                        | 531                        | 3,717                  |

**Table S2.** Comparing the relative abundance of *Bacteroides* operational taxonomic units in the stool of neonates using BLASTN.

| Differences, according to maternal pre-pregnancy BMI, in the (mean) relative abundance of operational taxonomic units (OTU) within the <i>Bacteroides</i> genus (g) among stools from neonates <b>delivered vaginally</b> . |         |                   |                                       |            |                                    |                                    |                |         |
|-----------------------------------------------------------------------------------------------------------------------------------------------------------------------------------------------------------------------------|---------|-------------------|---------------------------------------|------------|------------------------------------|------------------------------------|----------------|---------|
|                                                                                                                                                                                                                             |         |                   |                                       |            | Maternal BMI <25 kg/m <sup>2</sup> | Maternal BMI ≥25 kg/m <sup>2</sup> |                |         |
| Predicted taxonomy                                                                                                                                                                                                          | OTU ID  | Query length (nt) | Best hit (BLASTN)                     | Identities | Mean                               | Mean                               | Test Statistic | P value |
| g_Bacteroides; s_caccae                                                                                                                                                                                                     | 196664  | 204               | Bacteroides caccae strain JCM 9498    | 100%       | 2.92                               | 3.60                               | 4.40           | 0.04    |
| g_Bacteroides                                                                                                                                                                                                               | 1992    | 253               | Bacteroides caccae strain JCM 9498    | 99%        | 0.00                               | 4.80                               | 5.51           | 0.02    |
| g_Bacteroides                                                                                                                                                                                                               | 161423  | 253               | Bacteroides dorei strain 175          | 98%        | 22.85                              | 127.80                             | 8.83           | <0.01   |
| g_Bacteroides                                                                                                                                                                                                               | 172777  | 253               | Bacteroides dorei strain 175          | 98%        | 4.62                               | 12.00                              | 7.19           | 0.01    |
| g_Bacteroides                                                                                                                                                                                                               | 177222  | 253               | Bacteroides dorei strain 175          | 98%        | 1.77                               | 2.60                               | 5.32           | 0.02    |
| g_Bacteroides                                                                                                                                                                                                               | 4447950 | 253               | Bacteroides stercoris strain JCM 9496 | 100%       | 0.00                               | 4.80                               | 5.51           | 0.02    |
| g_Bacteroides                                                                                                                                                                                                               | 2875735 | 198               | Bacteroides vulgatus strain ATCC 8482 | 100%       | 14.15                              | 156.60                             | 9.26           | <0.01   |
| g_Bacteroides                                                                                                                                                                                                               | 3426658 | 205               | Bacteroides vulgatus strain ATCC 8482 | 100%       | 15.69                              | 252.40                             | 9.26           | <0.01   |
| g_Bacteroides                                                                                                                                                                                                               | 3439403 | 213               | Bacteroides vulgatus strain ATCC 8482 | 100%       | 6.62                               | 84.80                              | 9.51           | <0.01   |
| g_Bacteroides                                                                                                                                                                                                               | 3563235 | 219               | Bacteroides vulgatus strain ATCC 8482 | 100%       | 19.54                              | 263.40                             | 9.26           | <0.01   |
| g_Bacteroides                                                                                                                                                                                                               | 3600504 | 253               | Bacteroides vulgatus strain ATCC 8482 | 100%       | 215.38                             | 3212.60                            | 8.06           | <0.01   |
| g_Bacteroides                                                                                                                                                                                                               | 157327  | 253               | Bacteroides vulgatus strain ATCC 8482 | 99%        | 0.46                               | 8.80                               | 12.84          | <0.01   |
| g_Bacteroides                                                                                                                                                                                                               | 182255  | 253               | Bacteroides vulgatus strain ATCC 8482 | 99%        | 0.62                               | 4.00                               | 8.56           | <0.01   |
| g_Bacteroides                                                                                                                                                                                                               | 183662  | 246               | Bacteroides vulgatus strain ATCC 8482 | 99%        | 0.31                               | 2.20                               | 5.35           | 0.02    |
| g_Bacteroides                                                                                                                                                                                                               | 184209  | 253               | Bacteroides vulgatus strain ATCC 8482 | 99%        | 0.31                               | 3.00                               | 8.61           | <0.01   |
| g_Bacteroides                                                                                                                                                                                                               | 211706  | 253               | Bacteroides vulgatus strain ATCC 8482 | 99%        | 0.15                               | 3.20                               | 5.00           | 0.03    |
| g_Bacteroides                                                                                                                                                                                                               | 844375  | 207               | Bacteroides vulgatus strain ATCC 8482 | 99%        | 0.23                               | 28.20                              | 8.59           | <0.01   |
| g_Bacteroides                                                                                                                                                                                                               | 1508541 | 253               | Bacteroides vulgatus strain ATCC 8482 | 99%        | 0.69                               | 9.60                               | 6.37           | 0.01    |

|                                                                                                                                                                                                                               |         |                   |                                       |            |                                    |                                    |                |         |
|-------------------------------------------------------------------------------------------------------------------------------------------------------------------------------------------------------------------------------|---------|-------------------|---------------------------------------|------------|------------------------------------|------------------------------------|----------------|---------|
| g_Bacteroides                                                                                                                                                                                                                 | 1749079 | 192               | Bacteroides vulgatus strain ATCC 8482 | 99%        | 1.00                               | 20.80                              | 10.59          | <0.01   |
| g_Bacteroides                                                                                                                                                                                                                 | 1919007 | 253               | Bacteroides vulgatus strain ATCC 8482 | 99%        | 0.00                               | 2.60                               | 5.51           | 0.02    |
| g_Bacteroides                                                                                                                                                                                                                 | 2134452 | 198               | Bacteroides vulgatus strain ATCC 8482 | 99%        | 1.92                               | 35.00                              | 9.56           | <0.01   |
| g_Bacteroides                                                                                                                                                                                                                 | 2137001 | 201               | Bacteroides vulgatus strain ATCC 8482 | 99%        | 5.15                               | 94.80                              | 10.19          | <0.01   |
| g_Bacteroides                                                                                                                                                                                                                 | 3256931 | 219               | Bacteroides vulgatus strain ATCC 8482 | 99%        | 1.77                               | 25.00                              | 9.86           | <0.01   |
| g_Bacteroides                                                                                                                                                                                                                 | 3272632 | 205               | Bacteroides vulgatus strain ATCC 8482 | 99%        | 4.69                               | 69.80                              | 7.81           | 0.01    |
| g_Bacteroides                                                                                                                                                                                                                 | 3588390 | 253               | Bacteroides vulgatus strain ATCC 8482 | 99%        | 38.69                              | 545.20                             | 8.77           | <0.01   |
| g_Bacteroides                                                                                                                                                                                                                 | 3887769 | 253               | Bacteroides vulgatus strain ATCC 8482 | 99%        | 0.23                               | 2.00                               | 7.94           | <0.01   |
| g_Bacteroides                                                                                                                                                                                                                 | 4232045 | 253               | Bacteroides vulgatus strain ATCC 8482 | 99%        | 2.92                               | 165.60                             | 4.46           | 0.03    |
| g_Bacteroides                                                                                                                                                                                                                 | 4357811 | 253               | Bacteroides vulgatus strain ATCC 8482 | 99%        | 0.62                               | 2.60                               | 5.52           | 0.02    |
| g_Bacteroides                                                                                                                                                                                                                 | 4468234 | 253               | Bacteroides vulgatus strain ATCC 8482 | 99%        | 39.54                              | 396.40                             | 6.55           | 0.01    |
| g_Bacteroides                                                                                                                                                                                                                 | 270094  | 253               | Bacteroides vulgatus strain ATCC 8482 | 98%        | 0.69                               | 22.20                              | 4.24           | 0.04    |
| g_Bacteroides                                                                                                                                                                                                                 | 4256470 | 253               | Bacteroides xylanisolvens strain XB1A | 100%       | 0.00                               | 9.40                               | 5.51           | 0.02    |
| Differences, according to maternal pre-pregnancy BMI, in the (mean) relative abundance of operational taxonomic units (OTU) within the <i>Bacteroides</i> genus (g) among stools from neonates <b>delivered by C-section.</b> |         |                   |                                       |            |                                    |                                    |                |         |
|                                                                                                                                                                                                                               |         |                   |                                       |            | Maternal BMI <25 kg/m <sup>2</sup> | Maternal BMI ≥25 kg/m <sup>2</sup> |                |         |
| Predicted taxonomy                                                                                                                                                                                                            | OTU ID  | Query length (nt) | Best hit (BLASTN)                     | Identities | Mean                               | Mean                               | Test Statistic | P value |
| g_Bacteroides                                                                                                                                                                                                                 | 3563235 | 219               | Bacteroides vulgatus strain ATCC 8482 | 100%       | 3.53                               | 0.00                               | 4.66           | 0.03    |

## Weighted UniFrac Distance

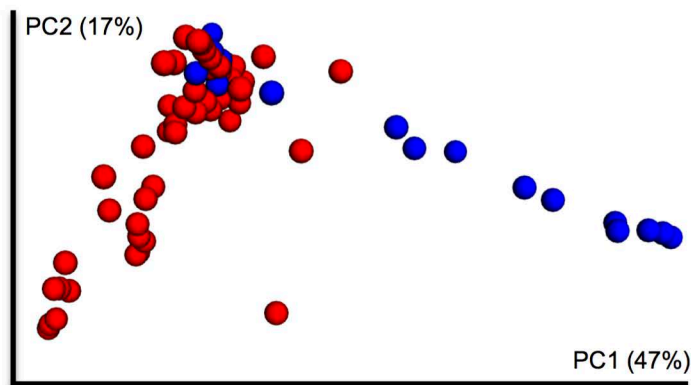

### PERMANOVA

C-section Delivered Neonatal Stool Microbiota  
vs.  
Vaginally Delivered Neonatal Stool Microbiota  
 $p < 0.001$

## Unweighted UniFrac Distance

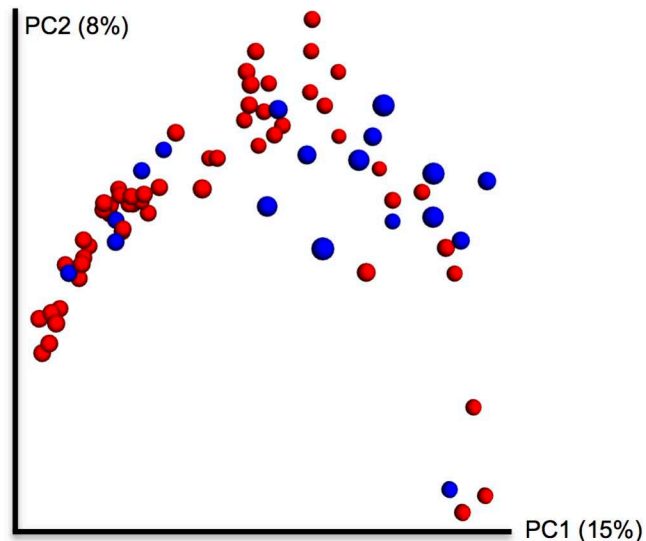

### PERMANOVA

C-section Delivered Neonatal Stool Microbiota  
vs.  
Vaginally Delivered Neonatal Stool Microbiota  
 $p < 0.001$

**Mode of Delivery**  
 **C-section (n=56)**  
 **Vaginal (n=18)**

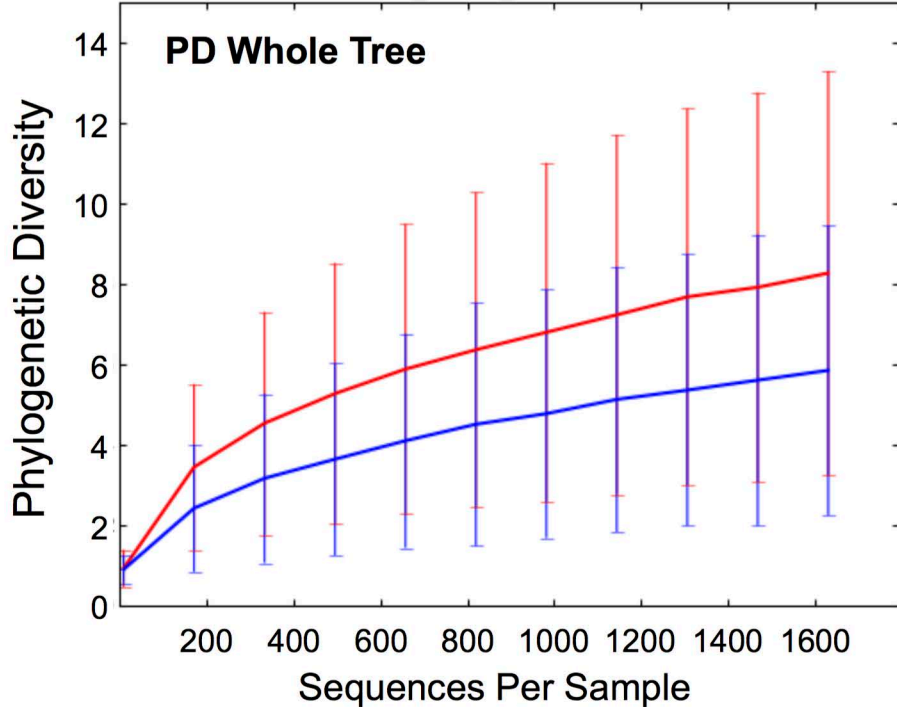

**Mode of Delivery**  
**C-section (n=56)**  
**Vaginal (n=18)**

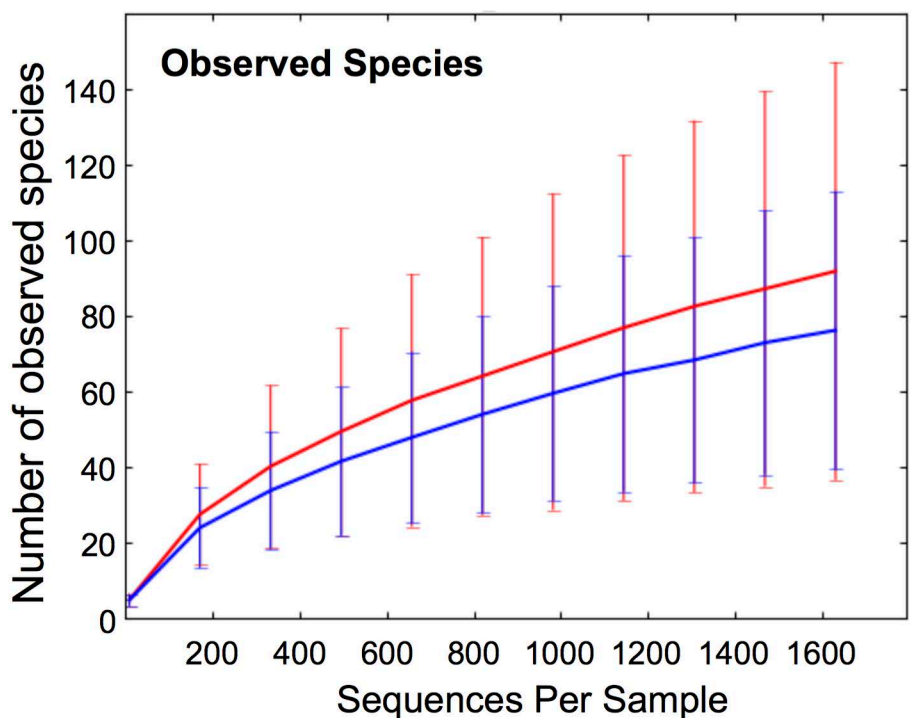

**Mode of Delivery**  
**C-section (n=56)**  
**Vaginal (n=18)**

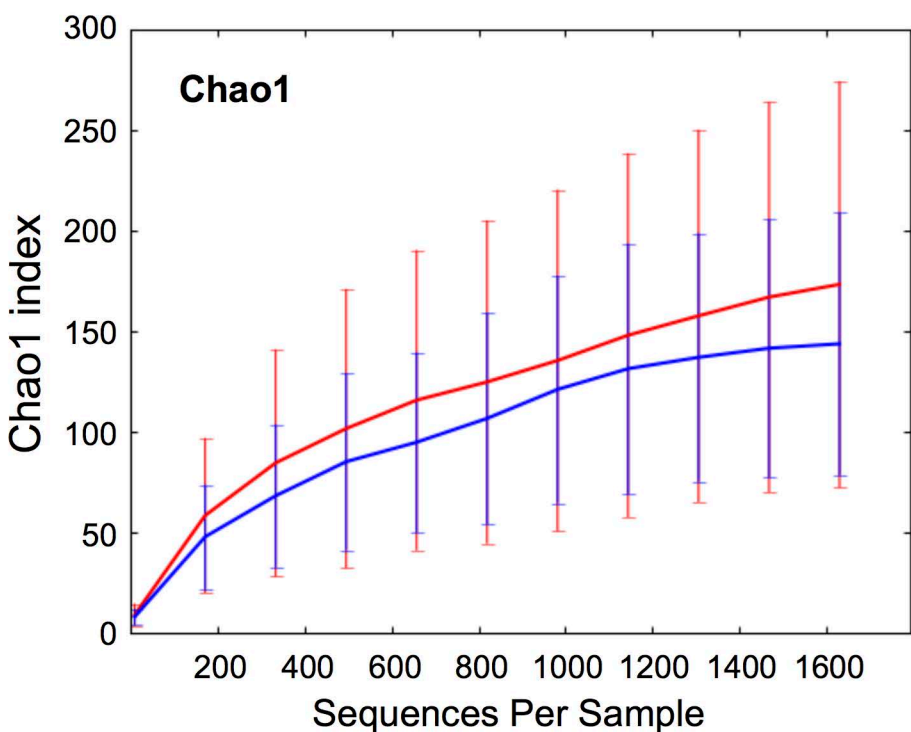

**Mode of Delivery**  
**C-section (n=56)**  
**Vaginal (n=18)**

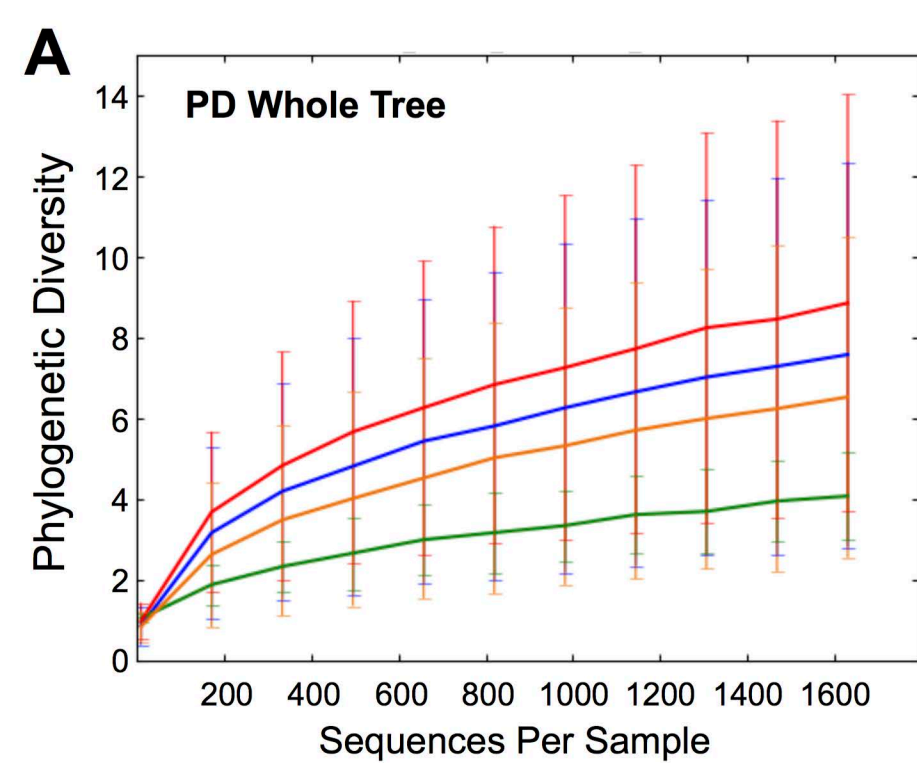

**C-section Delivered Neonates**  
Maternal BMI <25 kg/m<sup>2</sup> (n=30)

**C-section Delivered Neonates**  
Maternal BMI ≥25 kg/m<sup>2</sup> (n=26)

**Vaginal Delivered Neonates**  
Maternal BMI <25 kg/m<sup>2</sup> (n=13)

**Vaginal Delivered Neonates**  
Maternal BMI ≥25 kg/m<sup>2</sup> (n=5)

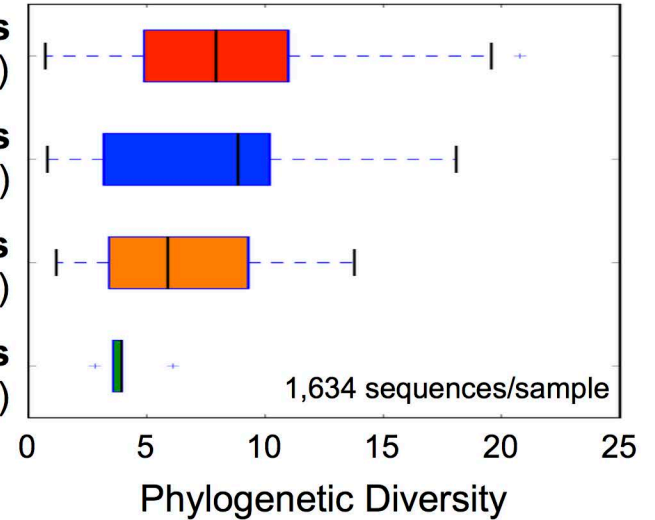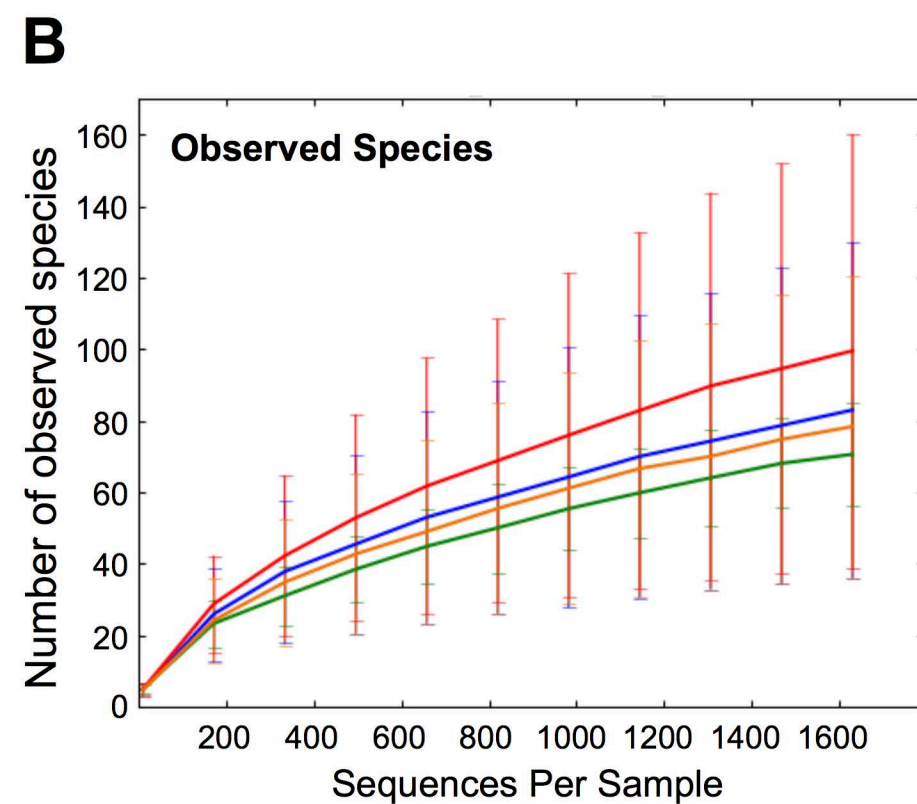

**C-section Delivered Neonates**  
Maternal BMI <25 kg/m<sup>2</sup> (n=30)

**C-section Delivered Neonates**  
Maternal BMI ≥25 kg/m<sup>2</sup> (n=26)

**Vaginal Delivered Neonates**  
Maternal BMI <25 kg/m<sup>2</sup> (n=13)

**Vaginal Delivered Neonates**  
Maternal BMI ≥25 kg/m<sup>2</sup> (n=5)

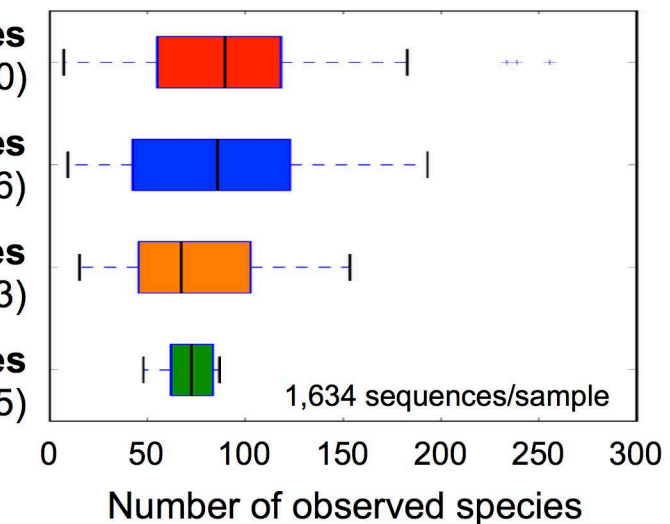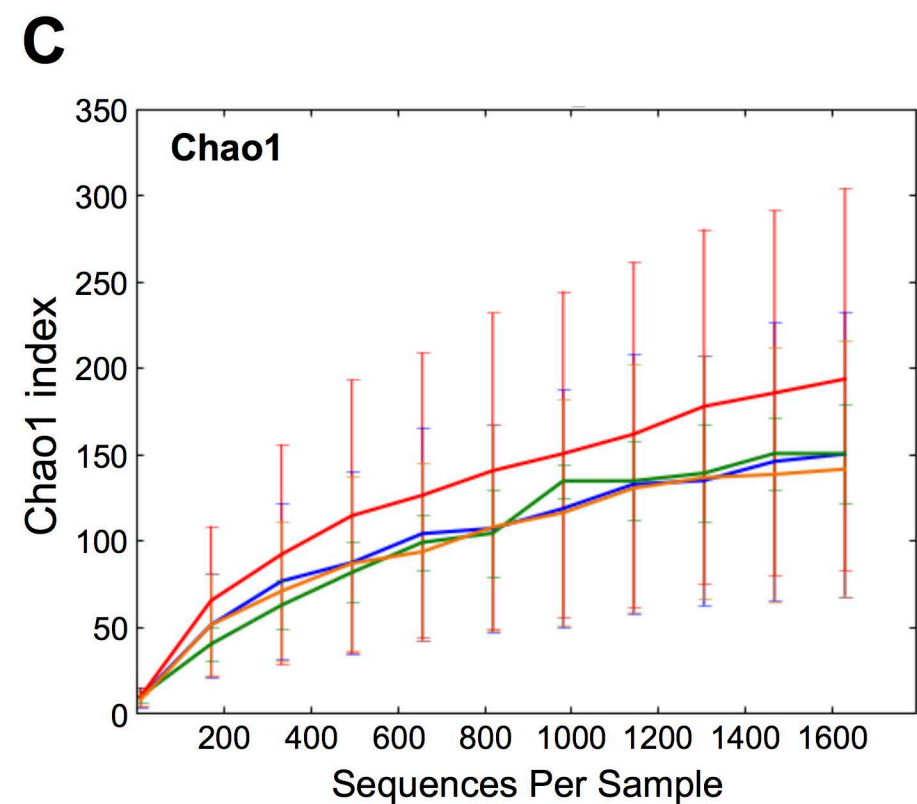

**C-section Delivered Neonates**  
Maternal BMI <25 kg/m<sup>2</sup> (n=30)

**C-section Delivered Neonates**  
Maternal BMI ≥25 kg/m<sup>2</sup> (n=26)

**Vaginal Delivered Neonates**  
Maternal BMI <25 kg/m<sup>2</sup> (n=13)

**Vaginal Delivered Neonates**  
Maternal BMI ≥25 kg/m<sup>2</sup> (n=5)

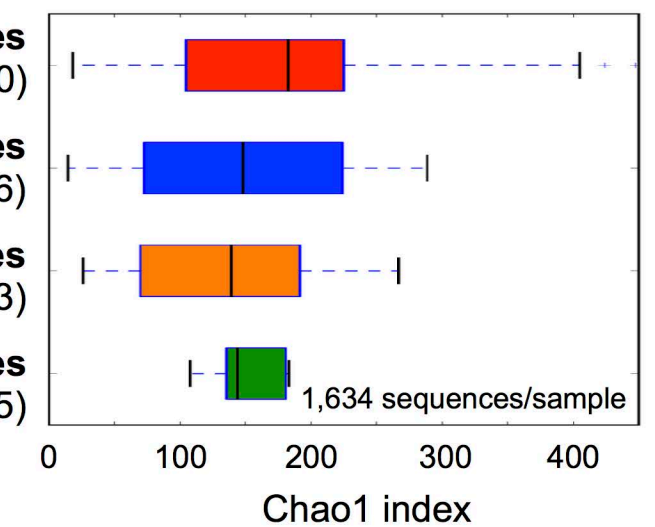



**A**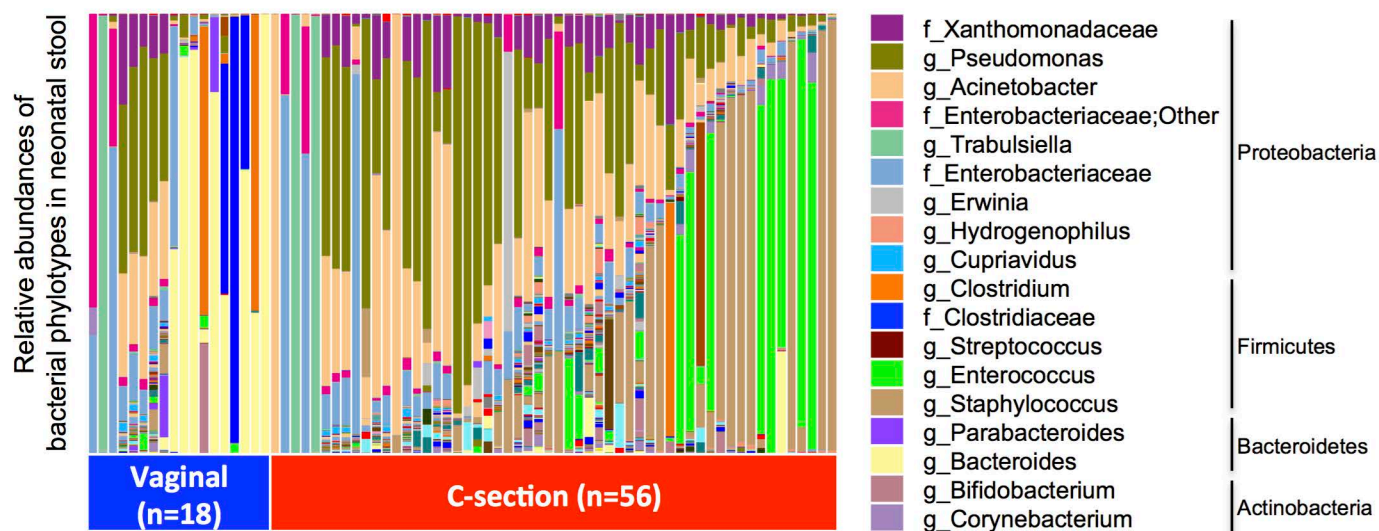**B**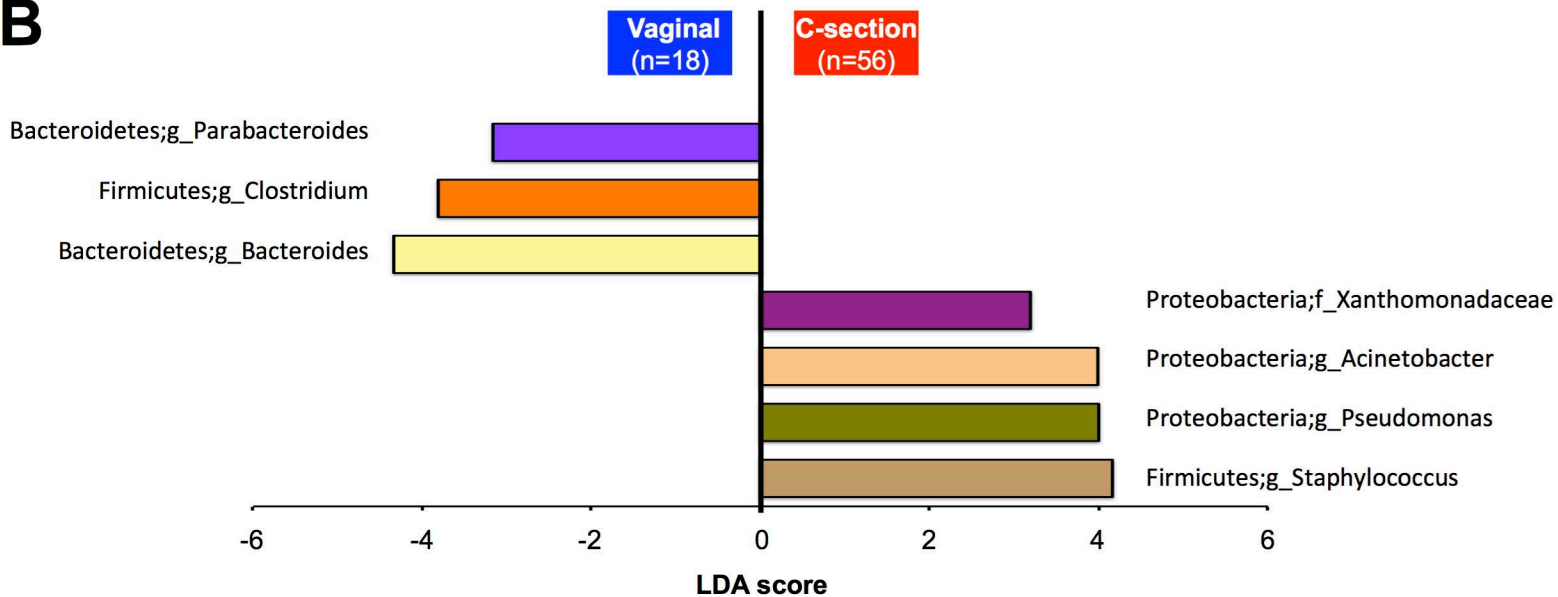

**A****Vaginally Delivered Neonates****C-section Delivered Neonates**

Relative abundances

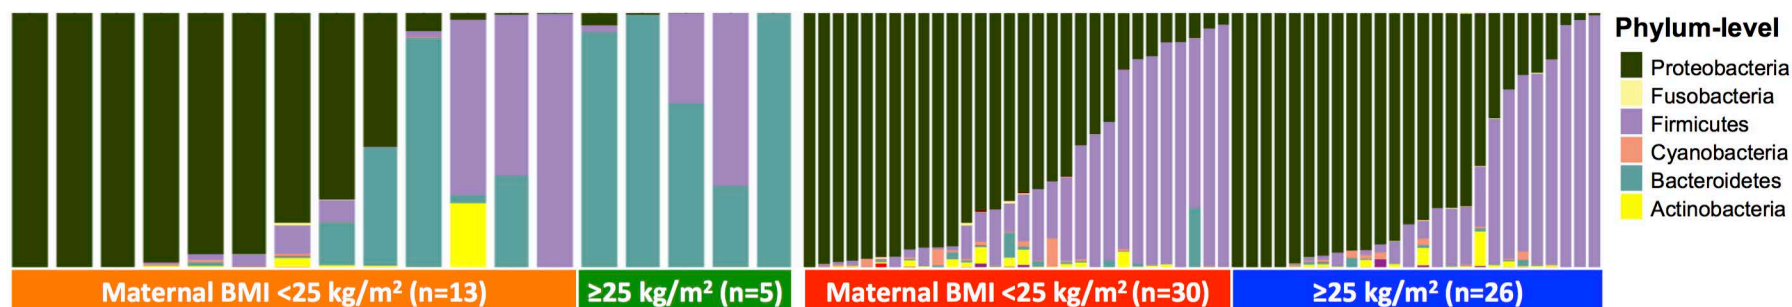**B****Vaginally Delivered Neonates****C-section Delivered Neonates**

Relative abundances

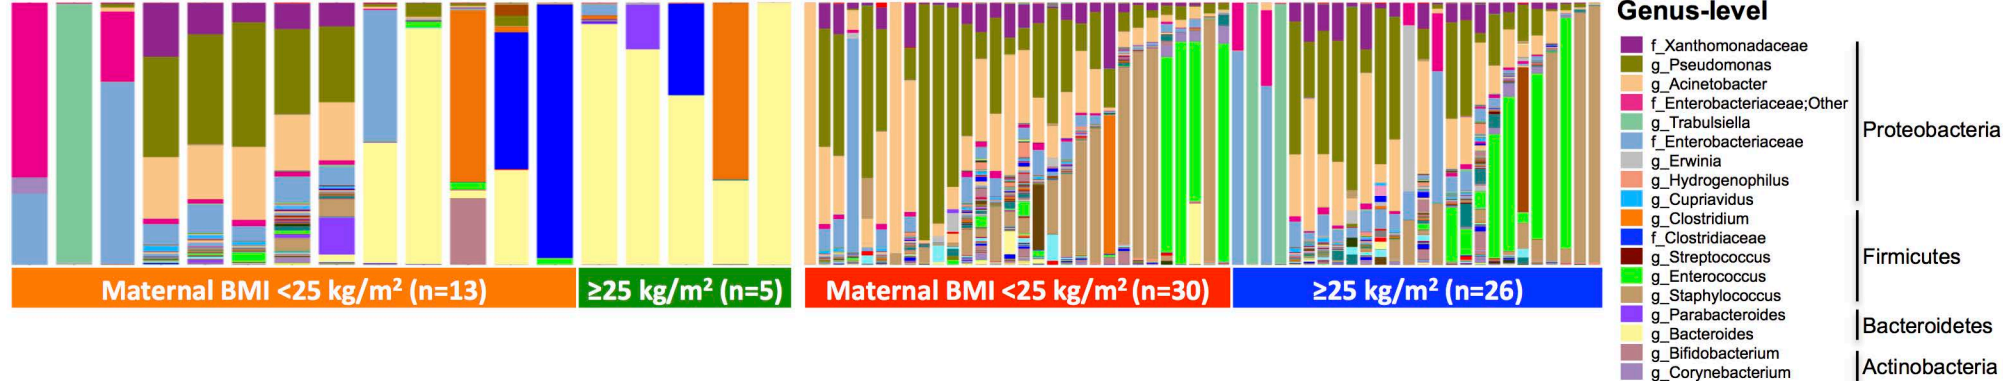

**A**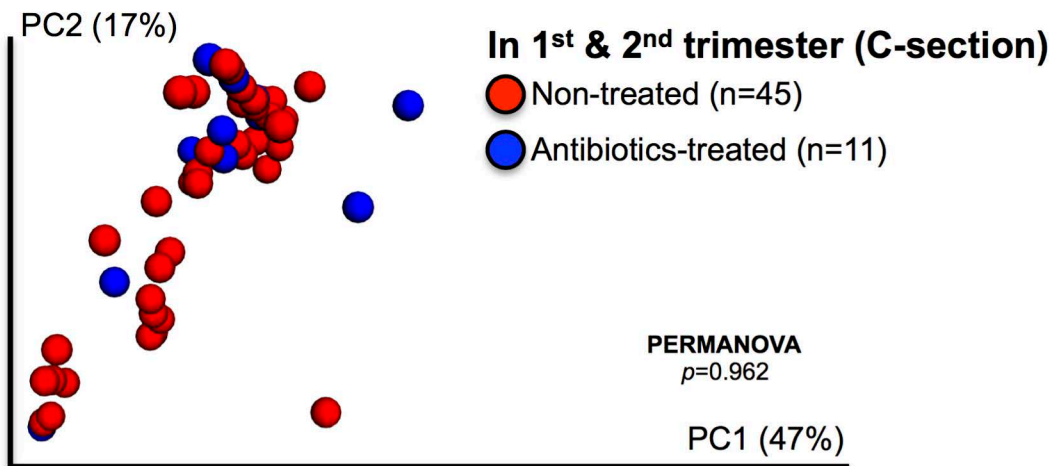**B**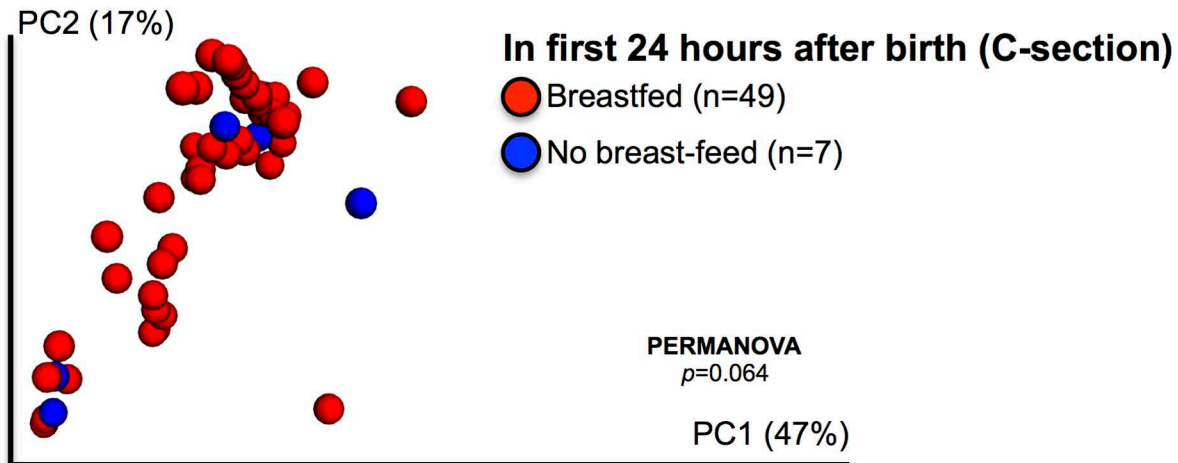

Supplement: srep23133-s1.pdf [file srep23133-s1.pdf]
